# Supplementary material for: Existence of HbF Enhancer Haplotypes atHBS1L-MYBIntergenic Region in Transfusion-Dependent Saudiβ-Thalassemia Patients
Source: Hindawi journal article supplement (doi:10.1155/2017/1972429), 2017-01-01
Supplement: f1 [file 1972429.f1.pdf]

**Supplementary Table S1:** Allelic association of 14 SNPs related to *BCL11A*, *HBS1L-MYB* (HMIP), and *HBG2* promoter region in patients with  $\beta$ -thalassemia and elevated HbF levels

| SNP ID     | Candidate Gene | Chromosome Position | Alleles (EA/OA) | High HbF Vs. Control |          |                | Low HbF Vs. Control |                |
|------------|----------------|---------------------|-----------------|----------------------|----------|----------------|---------------------|----------------|
|            |                |                     |                 | Odds Ratio (95% CI)  | $\chi^2$ | <i>p</i> value | $\chi^2$            | <i>p</i> value |
| rs2071348  | HBG2 region    | 11: 5242916         | T/G             | 1.159 (0.793-1.694)  | 0.587    | 0.4434         | 4.531               | <b>0.0333*</b> |
| rs7482144  | HBG2 region    | 11:5254939          | C/T             | 1.145 (0.764-1.715)  | 0.432    | 0.5108         | 2.573               | 0.1087         |
| rs5006884  | HBG2 region    | 11: 5352021         | T/C             | 1.339 (0.898-1.996)  | 2.06     | 0.1512         | 0.616               | 0.4325         |
| rs766432   | BCL11A         | 2:60492835          | A/C             | 1.045 (0.716-1.526)  | 0.054    | 0.8161         | 0.223               | 0.6366         |
| rs11886868 | BCL11A         | 2:60493111          | T/C             | 1.472 (1.038-2.087)  | 4.738    | <b>0.0295*</b> | 0.101               | 0.7507         |
| rs4671393  | BCL11A         | 2:60493816          | G/A             | 1.088 (0.742-1.596)  | 0.19     | 0.6626         | 0.292               | 0.589          |
| rs7557939  | BCL11A         | 2:60494212          | A/G             | 1.549 (1.092-2.198)  | 6.057    | <b>0.0138*</b> | 0.083               | 0.7735         |
| rs28384513 | HBS1L-MYB      | 6:135055071         | G/T             | 1.212 (0.789-1.862)  | 0.779    | 0.3774         | 2.274               | 0.1315         |
| rs9376090  | HBS1L-MYB      | 6:135090090         | C/T             | 2.343 (1.283-4.279)  | 8.038    | <b>0.0046*</b> | 6.331               | <b>0.0119*</b> |
| rs9399137  | HBS1L-MYB      | 6:135097880         | C/T             | 2.152 (1.168-3.964)  | 6.284    | <b>0.0122*</b> | 3.288               | 0.0698         |
| rs4895441  | HBS1L-MYB      | 6:135105435         | G/A             | 2.316 (1.283-4.182)  | 8.116    | <b>0.0044*</b> | 1.005               | 0.316          |
| rs9389269  | HBS1L-MYB      | 6:135106021         | C/T             | 2.101 (1.180-3.742)  | 6.577    | <b>0.0103*</b> | 0.725               | 0.3944         |
| rs9402686  | HBS1L-MYB      | 6:135106679         | A/G             | 2.101 (1.180-3.742)  | 6.577    | <b>0.0103*</b> | 0.725               | 0.3944         |
| rs9494142  | HBS1L-MYB      | 6:135110502         | C/T             | 2.218 (1.288-3.819)  | 8.577    | <b>0.0034*</b> | 0.418               | 0.518          |

\* Significant association *p*-values ( $p < 0.05$ ) for the allelic model. EA: effect allele tested for association; OA: Other allele; *p*: *p*-value unadjusted; Chromosome position as per GRCh38.p2 Assembly

**Supplementary Table S2:** Frequency of haplotypes of SNPs in *HBG2*, *BCL11A* and *HBS1L-MYB* compared between High HbF and Control cohorts.

| Block            | Candidate Gene | Haplotype      | High HbF Vs. Control |                                   | Low HbF Vs. Control |                |
|------------------|----------------|----------------|----------------------|-----------------------------------|---------------------|----------------|
|                  |                |                | $\chi^2$             | <i>p</i> Value                    | $\chi^2$            | <i>p</i> value |
| 1                | HBG2 region    | TCC            | 3.451                | 0.0632                            | 5.873               | <b>0.0154*</b> |
|                  | HBG2 region    | TCT            | 0.605                | 0.4367                            | 0.039               | 0.8426         |
|                  | HBG2 region    | <b>GTT</b>     | 7.959                | <b>0.0048*</b>                    | 0.731               | 0.3925         |
|                  | HBG2 region    | <b>GTC</b>     | 7.825                | <b>0.0052<math>\varphi</math></b> | 0.79                | 0.3742         |
|                  | HBG2 region    | GCC            | 2.012                | 0.1561                            | 2.353               | 0.125          |
|                  | HBG2 region    | <b>TTC</b>     | 4.185                | <b>0.0408<math>\varphi</math></b> | 0.858               | 0.3543         |
| 2                | BCL11A         | <b>ATGA</b>    | 5.041                | <b>0.0247*</b>                    | 0.083               | 0.7735         |
|                  | BCL11A         | CCAG           | 0.19                 | 0.6626                            | 0.292               | 0.589          |
|                  | BCL11A         | <b>ACGG</b>    | 6.792                | <b>0.0092<math>\varphi</math></b> | 0.021               | 0.884          |
| 3                | HBS1L-MYB      | TTTATGT        | 2.884                | 0.0894                            | 0.67                | 0.4132         |
|                  | HBS1L-MYB      | GTTATGT        | 0.114                | 0.7355                            | 0.196               | 0.658          |
|                  | HBS1L-MYB      | <b>GCCGCAC</b> | 4.611                | <b>0.0318*</b>                    | 1.571               | 0.21           |
|                  | HBS1L-MYB      | TCCGCAC        | 3.811                | 0.0509                            | 0.341               | 0.5593         |
|                  | HBS1L-MYB      | TTTATGC        | 1.023                | 0.3119                            | 0.322               | 0.5707         |
| Significant SNPs | HBS1L-MYB      | <b>TTATGT</b>  | 7.258                | <b>0.0071<math>\varphi</math></b> | -                   | -              |
|                  | HBS1L-MYB      | <b>CCGCAC</b>  | 8.763                | <b>0.0031*</b>                    | -                   | -              |
|                  | HBS1L-MYB      | TTATGC         | 1.023                | 0.3118                            | -                   | -              |

\*Significant risk haplotypes ( $p < 0.05$ ). Order of significant SNPs: rs9376090, rs9399137, rs4895441, rs9389269, rs9402686 and rs9494142.  $\varphi$  Haplotype associated with low HbF levels
